# Supplementary material for: Exploring challenges in learning and study skills among first-year medical students: a case study
Source: PubMed Central journal article supplement — BMC Med Educ. 2024 Aug 12;24:869. doi: 10.1186/s12909-024-05850-z (PMC11318319; doi:10.1186/s12909-024-05850-z), 2024-08-12
Supplement: 12909_2024_5850_MOESM1_ESM.pdf [file 12909_2024_5850_MOESM1_ESM.pdf]

S1 Table: Datasets.

| Year of graduation | Sex M/F | ANX_Percentile | ATT_Percentile | CON_Percentile | INP_Percentile | MOT_Percentile | SMI_Percentile | SFT_Percentile | TST_Percentile | TMT_Percentile | UAR_Percentile | ANXraw | ATTraw | CONraw | INPraw | MOTraw | SMIraw | SFTraw | TSTraw | TMTraw | UARraw |
|--------------------|---------|----------------|----------------|----------------|----------------|----------------|----------------|----------------|----------------|----------------|----------------|--------|--------|--------|--------|--------|--------|--------|--------|--------|--------|
| Co1                | M       | 80             | 75             | 95             | 75             | 85             | 95             | 85             | 95             | 80             | 5              | 24     | 27     | 28     | 25     | 28     | 29     | 24     | 28     | 23     | 12     |
| Co1                | F       | 75             | 80             | 35             | 35             | 60             | 85             | 50             | 85             | 75             | 85             | 23     | 28     | 18     | 20     | 25     | 26     | 18     | 26     | 22     | 26     |
| Co1                | F       | 40             | 10             | 50             | 35             | 20             | 55             | 40             | 65             | 90             | 5              | 17     | 19     | 20     | 20     | 21     | 22     | 17     | 23     | 26     | 13     |
| Co1                | F       | 80             | 75             | 80             | 80             | 90             | 90             | 90             | 80             | 80             | 45             | 24     | 27     | 24     | 26     | 29     | 28     | 25     | 25     | 23     | 20     |
| Co1                | F       | 80             | 80             | 75             | 15             | 30             | 25             | 50             | 30             | 25             | 5              | 24     | 28     | 23     | 17     | 22     | 18     | 18     | 19     | 15     | 12     |
| Co1                | M       | 80             | 45             | 80             | 65             | 30             | 70             | 25             | 75             | 80             | 15             | 24     | 24     | 24     | 24     | 22     | 24     | 15     | 24     | 23     | 16     |
| Co1                | F       | 5              | 75             | 30             | 35             | 30             | 55             | 50             | 50             | 40             | 1              | 8      | 27     | 17     | 20     | 22     | 22     | 18     | 21     | 17     | 11     |
| Co1                | F       | 25             | 45             | 15             | 25             | 1              | 5              | 15             | 5              | 45             | 5              | 14     | 24     | 14     | 19     | 14     | 12     | 13     | 15     | 18     | 12     |
| Co1                | M       | 50             | 80             | 65             | 99             | 40             | 90             | 55             | 90             | 45             | 10             | 18     | 28     | 22     | 30     | 23     | 28     | 19     | 27     | 18     | 14     |
| Co1                | F       | 15             | 45             | 5              | 99             | 15             | 10             | 65             | 50             | 20             | 5              | 12     | 24     | 12     | 30     | 20     | 14     | 20     | 21     | 14     | 13     |
| Co1                | F       | 50             | 80             | 50             | 60             | 60             | 20             | 25             | 30             | 35             | 15             | 18     | 28     | 20     | 23     | 25     | 17     | 15     | 19     | 16     | 16     |
| Co1                | M       | 40             | 5              | 65             | 35             | 20             | 30             | 35             | 25             | 45             | 45             | 17     | 16     | 22     | 20     | 21     | 19     | 16     | 18     | 18     | 20     |
| Co1                | F       | 10             | 15             | 30             | 1              | 5              | 10             | 15             | 5              | 20             | 55             | 10     | 20     | 17     | 12     | 18     | 14     | 13     | 14     | 14     | 21     |
| Co1                | F       | 20             | 35             | 45             | 20             | 30             | 30             | 55             | 65             | 75             | 15             | 13     | 23     | 19     | 18     | 22     | 19     | 19     | 23     | 22     | 16     |
| Co1                | F       | 15             | 75             | 5              | 75             | 20             | 20             | 65             | 50             | 25             | 25             | 11     | 27     | 11     | 25     | 21     | 17     | 20     | 21     | 15     | 17     |
| Co1                | F       | 5              | 45             | 1              | 75             | 50             | 15             | 70             | 5              | 5              | 5              | 9      | 24     | 9      | 25     | 24     | 16     | 21     | 14     | 11     | 12     |
| Co1                | M       | 95             | 1              | 75             | 95             | 90             | 90             | 90             | 75             | 95             | 70             | 29     | 15     | 23     | 29     | 29     | 27     | 25     | 24     | 29     | 23     |
| Co1                | F       | 1              | 75             | 15             | 65             | 30             | 1              | 40             | 30             | 25             | 30             | 6      | 27     | 14     | 24     | 22     | 10     | 17     | 19     | 15     | 18     |
| Co1                | F       | 40             | 75             | 45             | 90             | 90             | 15             | 95             | 75             | 85             | 99             | 17     | 27     | 19     | 28     | 29     | 16     | 28     | 24     | 24     | 30     |
| Co1                | F       | 60             | 20             | 15             | 45             | 1              | 20             | 10             | 15             | 45             | 35             | 20     | 21     | 14     | 21     | 16     | 17     | 12     | 17     | 18     | 19     |
| Co1                | F       | 30             | 45             | 50             | 1              | 1              | 10             | 1              | 5              | 10             | 30             | 15     | 24     | 20     | 12     | 14     | 14     | 9      | 14     | 12     | 18     |
| Co1                | F       | 85             | 55             | 50             | 25             | 65             | 40             | 80             | 80             | 70             | 60             | 25     | 25     | 20     | 19     | 26     | 20     | 23     | 25     | 21     | 22     |
| Co1                | F       | 70             | 65             | 80             | 65             | 65             | 45             | 90             | 50             | 60             | 55             | 22     | 26     | 24     | 24     | 26     | 21     | 25     | 21     | 20     | 21     |
| Co1                | F       | 80             | 55             | 45             | 85             | 65             | 10             | 80             | 50             | 70             | 10             | 24     | 25     | 19     | 27     | 26     | 15     | 23     | 21     | 21     | 15     |
| Co1                | F       | 15             | 35             | 75             | 45             | 40             | 45             | 40             | 15             | 55             | 75             | 11     | 23     | 23     | 21     | 23     | 21     | 17     | 17     | 19     | 24     |
| Co1                | F       | 25             | 65             | 25             | 65             | 50             | 25             | 35             | 15             | 1              | 60             | 14     | 26     | 16     | 24     | 24     | 18     | 16     | 17     | 9      | 22     |
| Co2                | M       | 15             | 55             | 35             | 90             | 75             | 60             | 90             | 40             | 85             | 45             | 12     | 25     | 18     | 28     | 27     | 23     | 25     | 20     | 24     | 20     |
| Co2                | F       | 1              | 75             | 85             | 1              | 40             | 40             | 75             | 40             | 60             | 1              | 7      | 27     | 25     | 14     | 23     | 20     | 22     | 20     | 20     | 9      |
| Co2                | F       | 95             | 1              | 60             | 15             | 30             | 45             | 75             | 65             | 25             | 5              | 29     | 12     | 21     | 17     | 22     | 21     | 22     | 23     | 15     | 13     |
| Co2                | F       | 65             | 5              | 30             | 35             | 40             | 25             | 50             | 55             | 60             | 10             | 21     | 17     | 17     | 20     | 23     | 18     | 18     | 22     | 20     | 14     |
| Co2                | F       | 10             | 10             | 20             | 90             | 50             | 10             | 75             | 1              | 15             | 10             | 10     | 18     | 15     | 28     | 24     | 15     | 22     | 11     | 13     | 14     |
| Co2                | M       | 99             | 10             | 5              | 15             | 50             | 80             | 40             | 85             | 5              | 5              | 30     | 18     | 12     | 17     | 24     | 25     | 17     | 26     | 11     | 13     |
| Co2                | F       | 55             | 55             | 75             | 65             | 40             | 45             | 75             | 55             | 35             | 30             | 19     | 25     | 23     | 24     | 23     | 21     | 22     | 22     | 16     | 18     |
| Co2                | F       | 10             | 10             | 45             | 80             | 90             | 55             | 75             | 30             | 60             | 10             | 10     | 18     | 19     | 26     | 29     | 22     | 22     | 19     | 20     | 15     |
| Co2                | F       | 5              | 5              | 60             | 90             | 50             | 1              | 95             | 40             | 60             | 5              | 9      | 17     | 21     | 28     | 24     | 10     | 28     | 20     | 20     | 12     |
| Co2                | F       | 65             | 15             | 1              | 60             | 1              | 30             | 1              | 30             | 1              | 30             | 21     | 20     | 10     | 23     | 11     | 19     | 8      | 19     | 8      | 18     |
| Co2                | M       | 95             | 45             | 1              | 75             | 50             | 60             | 15             | 95             | 1              | 45             | 29     | 24     | 7      | 25     | 24     | 23     | 13     | 28     | 9      | 20     |
| Co2                | M       | 85             | 10             | 5              | 45             | 50             | 30             | 20             | 50             | 10             | 10             | 25     | 18     | 12     | 21     | 24     | 19     | 14     | 21     | 12     | 14     |
| Co2                | F       | 85             | 20             | 25             | 50             | 30             | 45             | 25             | 40             | 10             | 5              | 25     | 21     | 16     | 22     | 22     | 21     | 15     | 20     | 12     | 13     |
| Co2                | M       | 75             | 65             | 50             | 35             | 40             | 40             | 40             | 55             | 25             | 5              | 23     | 26     | 20     | 20     | 23     | 20     | 17     | 22     | 15     | 12     |

|     |   |    |    |    |    |    |    |    |    |    |    |    |    |    |    |    |    |    |    |    |    |
|-----|---|----|----|----|----|----|----|----|----|----|----|----|----|----|----|----|----|----|----|----|----|
| Co2 | F | 15 | 35 | 90 | 65 | 75 | 45 | 1  | 25 | 40 | 60 | 12 | 23 | 26 | 24 | 27 | 21 | 7  | 18 | 17 | 22 |
| Co2 | M | 80 | 1  | 1  | 1  | 1  | 20 | 20 | 40 | 10 | 10 | 24 | 15 | 10 | 12 | 13 | 17 | 14 | 20 | 12 | 14 |
| Co2 | F | 50 | 55 | 65 | 45 | 85 | 70 | 55 | 15 | 70 | 15 | 18 | 25 | 22 | 21 | 28 | 24 | 19 | 17 | 21 | 16 |
| Co2 | M | 70 | 35 | 5  | 20 | 10 | 10 | 35 | 30 | 5  | 10 | 22 | 23 | 11 | 18 | 19 | 15 | 16 | 19 | 11 | 14 |
| Co2 | F | 40 | 10 | 5  | 25 | 10 | 15 | 20 | 5  | 45 | 1  | 17 | 18 | 11 | 19 | 19 | 16 | 14 | 15 | 18 | 11 |
| Co2 | F | 55 | 35 | 50 | 20 | 40 | 30 | 50 | 30 | 75 | 25 | 19 | 23 | 20 | 18 | 23 | 19 | 18 | 19 | 22 | 17 |
| Co2 | F | 55 | 20 | 65 | 45 | 15 | 40 | 70 | 15 | 45 | 55 | 19 | 21 | 22 | 21 | 20 | 20 | 21 | 17 | 18 | 21 |
| Co2 | F | 70 | 55 | 35 | 25 | 60 | 30 | 40 | 85 | 35 | 30 | 22 | 25 | 18 | 19 | 25 | 19 | 17 | 26 | 16 | 18 |
| Co2 | F | 20 | 10 | 45 | 50 | 15 | 25 | 35 | 30 | 70 | 70 | 13 | 19 | 19 | 22 | 20 | 18 | 16 | 19 | 21 | 23 |
| Co2 | M | 65 | 65 | 35 | 75 | 50 | 70 | 75 | 65 | 10 | 5  | 21 | 26 | 18 | 25 | 24 | 24 | 22 | 23 | 12 | 13 |
| Co2 | F | 60 | 80 | 75 | 75 | 85 | 80 | 40 | 85 | 90 | 85 | 20 | 28 | 23 | 25 | 28 | 25 | 17 | 26 | 25 | 26 |
| Co2 | M | 35 | 20 | 35 | 65 | 40 | 60 | 40 | 65 | 40 | 35 | 16 | 21 | 18 | 24 | 23 | 23 | 17 | 23 | 17 | 19 |
| Co2 | F | 50 | 65 | 65 | 45 | 15 | 45 | 65 | 30 | 60 | 45 | 18 | 26 | 22 | 21 | 20 | 21 | 20 | 19 | 20 | 20 |
| Co2 | F | 55 | 15 | 45 | 85 | 5  | 1  | 50 | 5  | 15 | 15 | 19 | 20 | 19 | 27 | 18 | 11 | 18 | 15 | 13 | 16 |
| Co2 | M | 60 | 45 | 65 | 65 | 65 | 80 | 65 | 75 | 75 | 30 | 20 | 24 | 22 | 24 | 26 | 25 | 20 | 24 | 22 | 18 |
| Co2 | F | 20 | 75 | 10 | 5  | 20 | 45 | 40 | 50 | 45 | 10 | 13 | 27 | 13 | 16 | 21 | 21 | 17 | 21 | 18 | 14 |
| Co2 | F | 20 | 10 | 10 | 45 | 15 | 30 | 25 | 15 | 25 | 15 | 13 | 18 | 13 | 21 | 20 | 19 | 15 | 17 | 15 | 16 |
| Co3 | F | 15 | 45 | 80 | 75 | 90 | 80 | 65 | 75 | 55 | 45 | 12 | 24 | 24 | 25 | 29 | 25 | 20 | 24 | 19 | 20 |
| Co3 | F | 65 | 90 | 80 | 65 | 60 | 20 | 90 | 40 | 90 | 55 | 21 | 29 | 24 | 24 | 25 | 17 | 26 | 20 | 26 | 21 |
| Co3 | F | 10 | 45 | 80 | 60 | 65 | 60 | 75 | 75 | 80 | 35 | 10 | 24 | 24 | 23 | 26 | 23 | 22 | 24 | 23 | 19 |
| Co3 | F | 1  | 45 | 35 | 50 | 10 | 40 | 70 | 15 | 55 | 25 | 6  | 24 | 18 | 22 | 19 | 20 | 21 | 17 | 19 | 17 |
| Co3 | M | 90 | 65 | 80 | 35 | 75 | 60 | 15 | 80 | 90 | 30 | 27 | 26 | 24 | 20 | 27 | 23 | 13 | 25 | 26 | 18 |
| Co3 | M | 15 | 45 | 10 | 75 | 15 | 70 | 80 | 50 | 1  | 1  | 12 | 24 | 13 | 25 | 20 | 24 | 23 | 21 | 9  | 10 |
| Co3 | F | 70 | 75 | 80 | 60 | 60 | 70 | 50 | 65 | 55 | 55 | 22 | 27 | 24 | 23 | 25 | 24 | 18 | 23 | 19 | 21 |
| Co3 | F | 95 | 99 | 99 | 99 | 85 | 99 | 95 | 99 | 99 | 90 | 29 | 30 | 30 | 30 | 28 | 30 | 28 | 30 | 30 | 27 |
| Co3 | M | 90 | 35 | 65 | 90 | 5  | 60 | 80 | 65 | 55 | 70 | 27 | 23 | 22 | 28 | 18 | 23 | 23 | 23 | 19 | 23 |
| Co3 | M | 80 | 90 | 60 | 25 | 60 | 80 | 50 | 80 | 60 | 15 | 24 | 29 | 21 | 19 | 25 | 25 | 18 | 25 | 20 | 16 |
| Co3 | F | 55 | 65 | 25 | 45 | 60 | 85 | 55 | 55 | 60 | 30 | 19 | 26 | 16 | 21 | 25 | 26 | 19 | 22 | 20 | 18 |
| Co3 | F | 95 | 65 | 90 | 80 | 90 | 80 | 95 | 80 | 95 | 80 | 28 | 26 | 26 | 26 | 29 | 25 | 27 | 25 | 28 | 25 |
| Co3 | F | 35 | 99 | 90 | 20 | 99 | 45 | 85 | 40 | 85 | 45 | 16 | 30 | 27 | 18 | 30 | 21 | 24 | 20 | 24 | 20 |
| Co3 | F | 5  | 99 | 85 | 35 | 40 | 55 | 95 | 30 | 85 | 70 | 9  | 30 | 25 | 20 | 23 | 22 | 27 | 19 | 24 | 23 |
| Co3 | F | 40 | 65 | 45 | 65 | 40 | 20 | 50 | 25 | 40 | 30 | 17 | 26 | 19 | 24 | 23 | 17 | 18 | 18 | 17 | 18 |
| Co3 | M | 55 | 65 | 30 | 50 | 85 | 80 | 85 | 55 | 90 | 30 | 19 | 26 | 17 | 22 | 28 | 25 | 24 | 22 | 25 | 18 |
| Co3 | M | 50 | 80 | 75 | 75 | 75 | 80 | 40 | 75 | 45 | 55 | 18 | 28 | 23 | 25 | 27 | 25 | 17 | 24 | 18 | 21 |
| Co3 | F | 20 | 20 | 15 | 25 | 30 | 25 | 65 | 5  | 10 | 15 | 13 | 21 | 14 | 19 | 22 | 18 | 20 | 14 | 12 | 16 |
| Co3 | F | 30 | 55 | 45 | 20 | 40 | 10 | 75 | 30 | 55 | 60 | 15 | 25 | 19 | 18 | 23 | 15 | 22 | 19 | 19 | 22 |
| Co3 | F | 5  | 75 | 75 | 99 | 90 | 60 | 95 | 40 | 35 | 90 | 9  | 27 | 23 | 30 | 29 | 23 | 28 | 20 | 16 | 27 |
| Co3 | F | 50 | 75 | 50 | 15 | 50 | 20 | 20 | 55 | 25 | 30 | 18 | 27 | 20 | 17 | 24 | 17 | 14 | 22 | 15 | 18 |
| Co3 | F | 99 | 65 | 90 | 5  | 60 | 25 | 75 | 99 | 90 | 30 | 30 | 26 | 26 | 15 | 25 | 18 | 22 | 30 | 26 | 18 |
| Co3 | F | 25 | 65 | 75 | 99 | 99 | 45 | 80 | 50 | 90 | 35 | 14 | 26 | 23 | 30 | 30 | 21 | 23 | 21 | 25 | 19 |
| Co3 | F | 70 | 80 | 65 | 90 | 10 | 85 | 20 | 65 | 10 | 10 | 22 | 28 | 22 | 28 | 19 | 26 | 14 | 23 | 12 | 15 |
| Co3 | F | 25 | 55 | 30 | 65 | 50 | 10 | 40 | 55 | 25 | 15 | 14 | 25 | 17 | 24 | 24 | 14 | 17 | 22 | 15 | 16 |
| Co3 | M | 35 | 55 | 1  | 75 | 60 | 5  | 5  | 25 | 15 | 1  | 16 | 25 | 6  | 25 | 25 | 13 | 10 | 18 | 13 | 7  |
| Co3 | F | 15 | 45 | 25 | 25 | 20 | 45 | 55 | 30 | 55 | 35 | 12 | 24 | 16 | 19 | 21 | 21 | 19 | 19 | 19 | 19 |
| Co3 | F | 95 | 90 | 90 | 85 | 99 | 95 | 99 | 75 | 85 | 75 | 28 | 29 | 27 | 27 | 30 | 29 | 30 | 24 | 24 | 24 |
| Co3 | F | 20 | 45 | 80 | 35 | 75 | 55 | 50 | 65 | 60 | 10 | 13 | 24 | 24 | 20 | 27 | 22 | 18 | 23 | 20 | 14 |
| Co3 | F | 15 | 90 | 85 | 85 | 90 | 55 | 90 | 65 | 90 | 35 | 12 | 29 | 25 | 27 | 29 | 22 | 26 | 23 | 25 | 19 |
| Co3 | F | 80 | 75 | 85 | 99 | 90 | 80 | 95 | 80 | 90 | 85 | 24 | 27 | 25 | 30 | 29 | 25 | 29 | 25 | 26 | 26 |

|     |   |    |    |    |    |    |    |    |    |    |    |    |    |    |    |    |    |    |    |    |    |
|-----|---|----|----|----|----|----|----|----|----|----|----|----|----|----|----|----|----|----|----|----|----|
| Co3 | F | 65 | 35 | 75 | 60 | 85 | 70 | 75 | 75 | 85 | 5  | 21 | 23 | 23 | 23 | 28 | 24 | 22 | 24 | 24 | 13 |
| Co3 | F | 55 | 99 | 75 | 95 | 75 | 55 | 85 | 75 | 75 | 80 | 19 | 30 | 23 | 29 | 27 | 22 | 24 | 24 | 22 | 25 |
| Co3 | M | 85 | 65 | 35 | 90 | 65 | 30 | 75 | 40 | 75 | 35 | 25 | 26 | 18 | 28 | 26 | 19 | 22 | 20 | 22 | 19 |
| Co3 | F | 55 | 80 | 65 | 60 | 60 | 10 | 5  | 50 | 60 | 75 | 19 | 28 | 22 | 23 | 25 | 15 | 11 | 21 | 20 | 24 |
| Co3 | M | 85 | 75 | 85 | 65 | 60 | 70 | 50 | 75 | 45 | 35 | 25 | 27 | 25 | 24 | 25 | 24 | 18 | 24 | 18 | 19 |
| Co3 | F | 70 | 75 | 20 | 45 | 50 | 25 | 40 | 40 | 60 | 55 | 22 | 27 | 15 | 21 | 24 | 18 | 17 | 20 | 20 | 21 |
| Co3 | F | 95 | 55 | 50 | 25 | 30 | 45 | 10 | 80 | 45 | 25 | 29 | 25 | 20 | 19 | 22 | 21 | 12 | 25 | 18 | 17 |
| Co3 | F | 85 | 99 | 90 | 85 | 65 | 85 | 25 | 50 | 55 | 70 | 25 | 30 | 26 | 27 | 26 | 26 | 15 | 21 | 19 | 23 |
| Co3 | F | 55 | 35 | 5  | 80 | 40 | 15 | 75 | 5  | 40 | 30 | 19 | 23 | 11 | 26 | 23 | 16 | 22 | 14 | 17 | 18 |
| Co3 | F | 25 | 75 | 35 | 35 | 50 | 30 | 20 | 30 | 45 | 30 | 14 | 27 | 18 | 20 | 24 | 19 | 14 | 19 | 18 | 18 |
| Co3 | F | 75 | 80 | 90 | 45 | 99 | 80 | 85 | 85 | 90 | 60 | 23 | 28 | 26 | 21 | 30 | 25 | 24 | 26 | 25 | 22 |
| Co3 | F | 75 | 55 | 65 | 50 | 50 | 70 | 35 | 55 | 55 | 60 | 23 | 25 | 22 | 22 | 24 | 24 | 16 | 22 | 19 | 22 |
| Co3 | F | 80 | 99 | 95 | 80 | 99 | 90 | 85 | 80 | 90 | 90 | 24 | 30 | 29 | 26 | 30 | 28 | 24 | 25 | 26 | 27 |
| Co3 | F | 50 | 80 | 85 | 35 | 30 | 45 | 20 | 50 | 45 | 55 | 18 | 28 | 25 | 20 | 22 | 21 | 14 | 21 | 18 | 21 |
| Co4 | F | 35 | 55 | 90 | 65 | 75 | 45 | 85 | 65 | 60 | 80 | 16 | 25 | 26 | 24 | 27 | 21 | 24 | 23 | 20 | 25 |
| Co4 | F | 85 | 65 | 80 | 75 | 65 | 85 | 50 | 90 | 55 | 35 | 25 | 26 | 24 | 25 | 26 | 26 | 18 | 27 | 19 | 19 |
| Co4 | M | 85 | 65 | 10 | 60 | 30 | 60 | 75 | 75 | 35 | 25 | 25 | 26 | 13 | 23 | 22 | 23 | 22 | 24 | 16 | 17 |
| Co4 | M | 99 | 80 | 60 | 90 | 99 | 95 | 35 | 99 | 70 | 35 | 30 | 28 | 21 | 28 | 30 | 29 | 16 | 30 | 21 | 19 |
| Co4 | F | 35 | 35 | 45 | 35 | 60 | 45 | 70 | 80 | 45 | 15 | 16 | 23 | 19 | 20 | 25 | 21 | 21 | 25 | 18 | 16 |
| Co4 | F | 60 | 99 | 95 | 65 | 85 | 30 | 95 | 90 | 95 | 15 | 20 | 30 | 28 | 24 | 28 | 19 | 27 | 27 | 27 | 16 |
| Co4 | F | 55 | 55 | 80 | 20 | 60 | 45 | 40 | 75 | 60 | 45 | 19 | 25 | 24 | 18 | 25 | 21 | 17 | 24 | 20 | 20 |
| Co4 | M | 25 | 55 | 45 | 65 | 65 | 30 | 50 | 30 | 45 | 15 | 14 | 25 | 19 | 24 | 26 | 19 | 18 | 19 | 18 | 16 |
| Co4 | F | 40 | 45 | 85 | 65 | 40 | 60 | 95 | 75 | 80 | 75 | 17 | 24 | 25 | 24 | 23 | 23 | 27 | 24 | 23 | 24 |
| Co4 | F | 10 | 75 | 35 | 1  | 30 | 1  | 70 | 75 | 60 | 1  | 10 | 27 | 18 | 14 | 22 | 11 | 21 | 24 | 20 | 9  |
| Co4 | F | 5  | 75 | 45 | 80 | 75 | 5  | 80 | 55 | 55 | 10 | 8  | 27 | 19 | 26 | 27 | 12 | 23 | 22 | 19 | 14 |
| Co4 | F | 60 | 65 | 90 | 65 | 75 | 60 | 65 | 65 | 90 | 80 | 20 | 26 | 26 | 24 | 27 | 23 | 20 | 23 | 25 | 25 |
| Co4 | F | 95 | 80 | 75 | 99 | 90 | 85 | 95 | 90 | 90 | 90 | 28 | 28 | 23 | 30 | 29 | 26 | 29 | 27 | 25 | 28 |
| Co4 | F | 95 | 75 | 85 | 95 | 50 | 90 | 90 | 95 | 10 | 90 | 28 | 27 | 25 | 29 | 24 | 27 | 25 | 29 | 12 | 28 |
| Co4 | M | 40 | 65 | 50 | 80 | 90 | 70 | 90 | 55 | 95 | 1  | 17 | 26 | 20 | 26 | 29 | 24 | 25 | 22 | 28 | 7  |
| Co4 | F | 25 | 80 | 1  | 35 | 40 | 10 | 25 | 5  | 5  | 45 | 14 | 28 | 8  | 20 | 23 | 15 | 15 | 15 | 11 | 20 |
| Co4 | M | 65 | 45 | 65 | 60 | 20 | 40 | 35 | 40 | 70 | 75 | 21 | 24 | 22 | 23 | 21 | 20 | 16 | 20 | 21 | 24 |
| Co4 | F | 99 | 90 | 75 | 95 | 75 | 95 | 90 | 99 | 80 | 15 | 30 | 29 | 23 | 29 | 27 | 29 | 25 | 30 | 23 | 16 |
| Co4 | M | 75 | 30 | 80 | 65 | 99 | 90 | 90 | 90 | 90 | 55 | 23 | 22 | 24 | 24 | 30 | 28 | 25 | 27 | 26 | 21 |
| Co4 | F | 90 | 35 | 90 | 90 | 90 | 70 | 55 | 85 | 80 | 1  | 27 | 23 | 26 | 28 | 29 | 24 | 19 | 26 | 23 | 11 |
| Co4 | M | 70 | 65 | 25 | 75 | 85 | 70 | 70 | 55 | 60 | 35 | 22 | 26 | 16 | 25 | 28 | 24 | 21 | 22 | 20 | 19 |
| Co4 | M | 70 | 65 | 75 | 20 | 65 | 45 | 55 | 85 | 80 | 5  | 22 | 26 | 23 | 18 | 26 | 21 | 19 | 26 | 23 | 12 |
| Co4 | M | 85 | 65 | 65 | 60 | 90 | 55 | 40 | 80 | 95 | 15 | 25 | 26 | 22 | 23 | 29 | 22 | 17 | 25 | 27 | 16 |
| Co4 | F | 40 | 80 | 35 | 60 | 85 | 10 | 95 | 15 | 35 | 99 | 17 | 28 | 18 | 23 | 28 | 15 | 27 | 17 | 16 | 30 |
| Co4 | M | 85 | 75 | 80 | 60 | 99 | 80 | 70 | 95 | 55 | 35 | 25 | 27 | 24 | 23 | 30 | 25 | 21 | 28 | 19 | 19 |
| Co4 | F | 85 | 30 | 60 | 20 | 50 | 15 | 1  | 10 | 25 | 30 | 25 | 22 | 21 | 18 | 24 | 16 | 9  | 16 | 15 | 18 |
| Co4 | F | 1  | 1  | 10 | 1  | 85 | 1  | 5  | 25 | 10 | 85 | 6  | 14 | 13 | 12 | 28 | 9  | 11 | 18 | 12 | 26 |
| Co4 | F | 95 | 65 | 50 | 25 | 90 | 55 | 80 | 65 | 45 | 30 | 28 | 26 | 20 | 19 | 29 | 22 | 23 | 23 | 18 | 18 |
| Co4 | F | 65 | 65 | 75 | 65 | 50 | 60 | 75 | 30 | 85 | 60 | 21 | 26 | 23 | 24 | 24 | 23 | 22 | 19 | 24 | 22 |
| Co4 | F | 30 | 55 | 5  | 35 | 50 | 10 | 40 | 50 | 25 | 10 | 15 | 25 | 12 | 20 | 24 | 14 | 17 | 21 | 15 | 14 |
| Co4 | F | 50 | 80 | 50 | 60 | 85 | 40 | 80 | 55 | 35 | 60 | 18 | 28 | 20 | 23 | 28 | 20 | 23 | 22 | 16 | 22 |
| Co4 | F | 55 | 55 | 15 | 85 | 15 | 20 | 20 | 40 | 20 | 10 | 19 | 25 | 14 | 27 | 20 | 17 | 14 | 20 | 14 | 15 |
| Co4 | F | 55 | 90 | 90 | 95 | 75 | 40 | 80 | 75 | 35 | 99 | 19 | 29 | 26 | 29 | 27 | 20 | 23 | 24 | 16 | 30 |
| Co4 | F | 90 | 45 | 80 | 5  | 65 | 40 | 15 | 80 | 45 | 55 | 26 | 24 | 24 | 16 | 26 | 20 | 13 | 25 | 18 | 21 |
| Co4 | F | 95 | 65 | 25 | 20 | 10 | 30 | 1  | 55 | 40 | 55 | 29 | 26 | 16 | 18 | 19 | 19 | 9  | 22 | 17 | 21 |

|     |   |    |    |    |    |    |    |    |    |    |    |    |    |    |    |    |    |    |    |    |    |
|-----|---|----|----|----|----|----|----|----|----|----|----|----|----|----|----|----|----|----|----|----|----|
| Co4 | M | 90 | 90 | 45 | 65 | 40 | 15 | 75 | 55 | 85 | 30 | 26 | 29 | 19 | 24 | 23 | 16 | 22 | 22 | 24 | 18 |
| Co4 | M | 65 | 80 | 60 | 90 | 65 | 55 | 85 | 80 | 40 | 35 | 21 | 28 | 21 | 28 | 26 | 22 | 24 | 25 | 17 | 19 |
| Co4 | F | 75 | 45 | 60 | 65 | 40 | 40 | 75 | 55 | 80 | 30 | 23 | 24 | 21 | 24 | 23 | 20 | 22 | 22 | 23 | 18 |
| Co4 | F | 30 | 90 | 95 | 75 | 99 | 90 | 65 | 90 | 90 | 25 | 15 | 29 | 28 | 25 | 30 | 28 | 20 | 27 | 25 | 17 |
| Co4 | M | 35 | 55 | 45 | 85 | 60 | 55 | 65 | 25 | 60 | 25 | 16 | 25 | 19 | 27 | 25 | 22 | 20 | 18 | 20 | 17 |
| Co4 | M | 85 | 55 | 80 | 60 | 15 | 40 | 75 | 55 | 60 | 70 | 25 | 25 | 24 | 23 | 20 | 20 | 22 | 22 | 20 | 23 |
| Co4 | M | 60 | 10 | 50 | 1  | 60 | 25 | 25 | 75 | 85 | 10 | 20 | 19 | 20 | 14 | 25 | 18 | 15 | 24 | 24 | 15 |
| Co4 | F | 25 | 65 | 25 | 20 | 15 | 10 | 85 | 50 | 60 | 70 | 14 | 26 | 16 | 18 | 20 | 14 | 24 | 21 | 20 | 23 |
| Co4 | M | 95 | 80 | 80 | 75 | 30 | 90 | 65 | 95 | 15 | 30 | 29 | 28 | 24 | 25 | 22 | 27 | 20 | 29 | 13 | 18 |
| Co4 | M | 90 | 55 | 95 | 80 | 40 | 70 | 65 | 80 | 80 | 70 | 26 | 25 | 28 | 26 | 23 | 24 | 20 | 25 | 23 | 23 |

Co1: Cohort 1 (2019); Co2: Cohort 2 (2020); Co3: Cohort 3 (2021); Co4: Cohort 4(2022)
